# Supplementary material
Source: PubMed Central journal article supplement (PMC4829966)
Supplement: NIHMS763002-supplement-suppapp.pdf [file NIHMS763002-supplement-suppapp.pdf]

## Supplementary Appendix

This appendix has been provided by the authors to give readers additional information about their work.

Supplement to: Hall CB, Weinberg GA, Iwane MK, et al. The burden of respiratory syncytial virus infection in young children. *N Engl J Med* 2009;360:588-98.

**Supplemental Table 1. Characteristics of Children Enrolled less than 5 Years of Age with Acute Respiratory Illnesses from Respiratory Syncytial**

**Virus (RSV) Compared to those with Acute Respiratory Illness not from RSV**

**from October 1, 2000 – September 2004 according to Provider Type.**

| <u>N (total)</u>             | <u>Hospitalized Patients</u> |                | <u>p</u> | <u>ED Patients</u> |                | <u>p</u> | <u>Office Patients</u> |                | <u>p</u> | <u>RSV Patients</u> |
|------------------------------|------------------------------|----------------|----------|--------------------|----------------|----------|------------------------|----------------|----------|---------------------|
|                              | <u>With RSV</u>              | <u>Not RSV</u> |          | <u>With RSV</u>    | <u>Not RSV</u> |          | <u>With RSV</u>        | <u>Not RSV</u> |          | <u>By provider</u>  |
|                              | <u>N %</u>                   | <u>N %</u>     |          | <u>N %</u>         | <u>N %</u>     |          | <u>N %</u>             | <u>N %</u>     |          | <u>Type</u>         |
| <b><u>Gender</u></b>         |                              |                |          |                    |                |          |                        |                |          |                     |
| Girls                        | 245 (43)                     | 1045 (45)      | 0.54     | 78 (42)            | 390 (47)       | 0.258    | 82 (48)                | 466 (47)       | 0.831    | 0.51                |
| Boys                         | 319 (57)                     | 1283 (55)      |          | 106 (58)           | 440 (53)       |          | 89 (52)                | 524 (53)       |          |                     |
| <b><u>Race/Ethnicity</u></b> |                              |                |          |                    |                |          |                        |                |          |                     |
| White                        | 313 (56)                     | 1064 (46)      | 0.001    | 72 (39)            | 253 (39)       | 0.103    | 55 (32)                | 449 (45)       | 0.07     | <0.001              |
| Black                        | 165 (29)                     | 825 (35)       |          | 76 (41)            | 389 (47)       |          | 64 (37)                | 329 (33)       |          |                     |
| Hispanic                     | 59 (11)                      | 290 (12)       |          | 25 (14)            | 113 (14)       |          | 63 (19)                | 122 (12)       |          |                     |
| Other/unknown                | 27 (4)                       | 149 (6)        |          | 11 (6)             | 75 (9)         |          | 20 (12)                | 90 (9)         |          |                     |
| <b><u>Age (months)</u></b>   |                              |                |          |                    |                |          |                        |                |          |                     |
| 0-5                          | 328 (58)                     | 1042 (45)      | <0.001   | 51 (28)            | 144 (17)       | <0.001   | 37 (21)                | 113 (12)       | <0.001   | <0.001              |

|              |                |                 |                |                 |                |                 |
|--------------|----------------|-----------------|----------------|-----------------|----------------|-----------------|
| <b>6-11</b>  | <b>97 (17)</b> | <b>306 (13)</b> | <b>45 (24)</b> | <b>149 (18)</b> | <b>40 (24)</b> | <b>205 (21)</b> |
| <b>12-23</b> | <b>99 (17)</b> | <b>441 (19)</b> | <b>47 (26)</b> | <b>238 (29)</b> | <b>28 (16)</b> | <b>275 (28)</b> |
| <b>24-59</b> | <b>40 (7)</b>  | <b>539 (23)</b> | <b>41 (22)</b> | <b>299 (36)</b> | <b>66 (39)</b> | <b>397 (40)</b> |

**Insurance:**

|                |                 |                  |                 |                 |                 |                 |
|----------------|-----------------|------------------|-----------------|-----------------|-----------------|-----------------|
| <b>Public</b>  | <b>295 (52)</b> | <b>1237 (53)</b> | <b>110 (60)</b> | <b>576 (69)</b> | <b>110 (64)</b> | <b>571 (58)</b> |
| <b>Private</b> | <b>225 (40)</b> | <b>860 (37)</b>  | <b>65 (35)</b>  | <b>200 (24)</b> | <b>54 (32)</b>  | <b>397 (40)</b> |
| <b>None</b>    | <b>39 (7)</b>   | <b>214 (9)</b>   | <b>9 (5)</b>    | <b>53 (6)</b>   | <b>5 (3)</b>    | <b>17 (2)</b>   |
| <b>Unknown</b> | <b>5 (1)</b>    | <b>17 (1)</b>    | <b>0 (0)</b>    | <b>1 (0)</b>    | <b>2 (1)</b>    | <b>5 (1)</b>    |

*0.15*      *0.007*      *0.084*      *0.03*
